# Supplementary material for: An adaptive method for cDNA microarray normalization
Source: Springer Nature journal article supplement (doi:10.1186/1471-2105-6-28), 2005-02-11
Supplement: Additional file 6 [file 1471-2105-6-28-s6.pdf]

Table 3: Different number of genes sampled in each interval.

| Range for $\log_2(\text{ratio})$ | # of sampled genes |
|----------------------------------|--------------------|
| 2.50 ---- inf                    | 40                 |
| 2.00 ---- 2.50                   | 25                 |
| 1.50 ---- 2.00                   | 20                 |
| 1.25 ---- 1.50                   | 15                 |
| 1.00 ---- 1.25                   | 10                 |
| 0.75 ---- 1.00                   | 10                 |
| 0.50 ---- 0.75                   | 10                 |
| 0.25 ---- 0.50                   | 10                 |
| 0.00 ---- 0.25                   | 10                 |
| (-0.25) ---- 0.00                | 10                 |
| (-0.50) ---- (-0.25)             | 10                 |
| (-0.75) ---- (-0.50)             | 10                 |
| (-1.00) ---- (-0.75)             | 15                 |
| (-1.25) ---- (-1.00)             | 20                 |
| (-1.50) ---- (-1.25)             | 30                 |
| (-2.00) ---- (-1.50)             | 40                 |
| (-2.50) ---- (-2.00)             | 50                 |
| -inf ---- (-2.50)                | 65                 |
| Total number of genes            | 400                |
