# Supplementary material for: An adaptive method for cDNA microarray normalization
Source: Springer Nature journal article supplement (doi:10.1186/1471-2105-6-28), 2005-02-11
Supplement: Additional file 7 [file 1471-2105-6-28-s7.pdf]

Table 4: Comparison of RMSE by using the adaptive method and the global method with real data by a different sampling method. The procedure to generate the data was described in the paper and the sampling rate was shown in Table 3 [see Additional file 6].

| Case | Array Id | Global | Adaptive |
|------|----------|--------|----------|
| 1    | svcc134  | 1.091  | 0.213    |
| 2    | svcc104  | 1.055  | 0.412    |
| 3    | svcc120  | 1.024  | 0.219    |
| 4    | svcc64   | 1.019  | 0.476    |
| 5    | svcc106  | 1.046  | 0.196    |
| 6    | svcc89   | 1.040  | 0.199    |
| 7    | svcc109  | 1.036  | 0.161    |
| 8    | svcc103  | 1.045  | 0.161    |
| 9    | svcc98   | 1.038  | 0.341    |
| 10   | svcc82   | 1.039  | 0.482    |
